# Supplementary material
Source: publisher figshare collection journal article supplement (https://sage.figshare.com/ndownloader/files/14052713)
Supplement: Supplementary file 1 [file 14052713]

**Gender differences in research productivity among academic psychiatrists in Canada.**

**Table S1. Number of physician faculty by department and region.**

| <b>Region</b>           | <b>University</b>                   | <b>No. of Psychiatrists (N)</b> |
|-------------------------|-------------------------------------|---------------------------------|
| <i>Eastern (N=230)</i>  | Memorial University                 | 62                              |
|                         | Dalhousie University                | 177                             |
| <i>Quebec (N=790)</i>   | Université de Sherbrooke            | 115                             |
|                         | Université Laval                    | 203                             |
|                         | McGill University                   | 206                             |
|                         | Université de Montreal              | 266                             |
| <i>Ontario (N=1255)</i> | Northern Ontario School of Medicine | 71                              |
|                         | University of Western Ontario       | 88                              |
|                         | Queens University                   | 99                              |
|                         | McMaster University                 | 140                             |
|                         | University of Ottawa                | 199                             |
|                         | University of Toronto               | 658                             |
| <i>Western (N=1095)</i> | University of Manitoba              | 119                             |
|                         | University of Saskatchewan          | 97                              |
|                         | University of Alberta               | 135                             |
|                         | University of Calgary               | 201                             |
|                         | University of British Columbia      | 543                             |
|                         | <b>Total</b>                        | <b>3379</b>                     |
